# Supplementary material
Source: Springer Nature journal article supplement (https://www.springermedizin.de/resource/supplementary/13013_2013_649_MOESM2_ESM.pdf/9632140)
Supplement: MOESM2 [file 9632140]

Importance of the health problem  
Health service provision  
(Prevalence, Positive Predictive Value  
and Referral rates)

**Clinical  
Effectiveness**

Benefits of program  
participation  
(Early detection, Surgery rates)

Suitability of screening test  
(Validity and Reliability)

**Technical  
Efficacy**

**Program  
Effectiveness**

**Effectiveness**

Direct and Indirect Costs

**Cost  
Effectiveness**

(Not covered in this review)

**Treatment  
Effectiveness**
